# Supplementary material for: A DFT study on the interaction between glycine molecules/radicals and the (8, 0) SiCNT
Source: Royal Society of Chemistry journal article supplement (doi:10.1039/c4cp01951b), 2014-01-01

## DFT Study on the Interaction between Glycine Molecules/Radicals with (8, 0) SiCNT

Kefu Gao,<sup>a</sup> Guanghui Chen,<sup>\*a</sup> and Di Wu<sup>b</sup>

5

### Supporting Information

**Figure S1.** The band structures of individual glycine molecule adsorbed on (8, 0) SiCNT with the (a) monodentate configurations for *trans*-I and *cis*-II; (b) cycloaddition configurations for *trans*-I and *cis*-II as well as dissociation configurations for *trans*-I. The Fermi level is dotted with a red line.

**10 Figure S2.** The optimized configurations of maximum number of glycine molecules adsorbed on the (n, 0) (n=7, 8, 9 and 10) SiCNTs based on the configuration of M<sub>1</sub>-a.

**Figure S3.** The plotted HOMO and LUMO of glycine radicals adsorbed on (8, 0) SiCNT with isosurface values of 0.03 a.u.

Cite this: DOI: 10.1039/c0xx00000x

www.rsc.org/xxxxxx

## Supporting information

Figure S1(a).

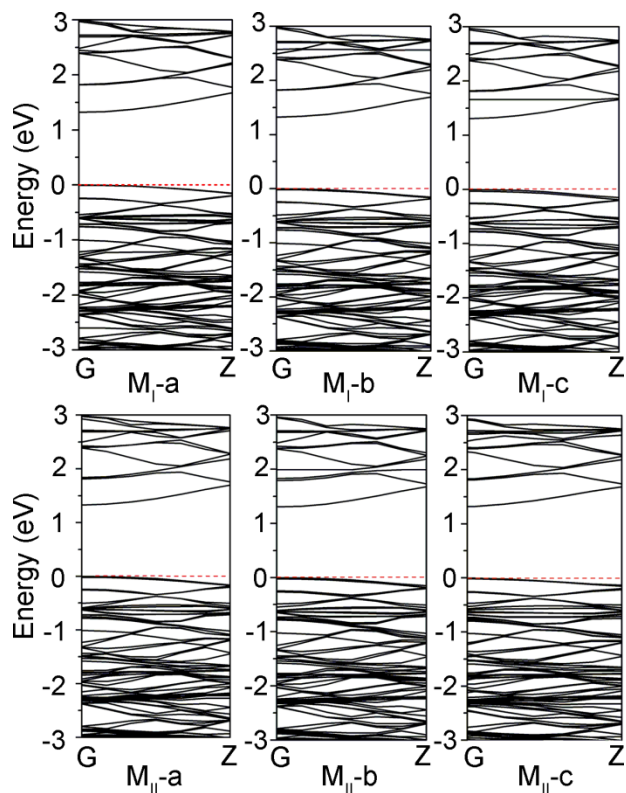

Figure S1(b).

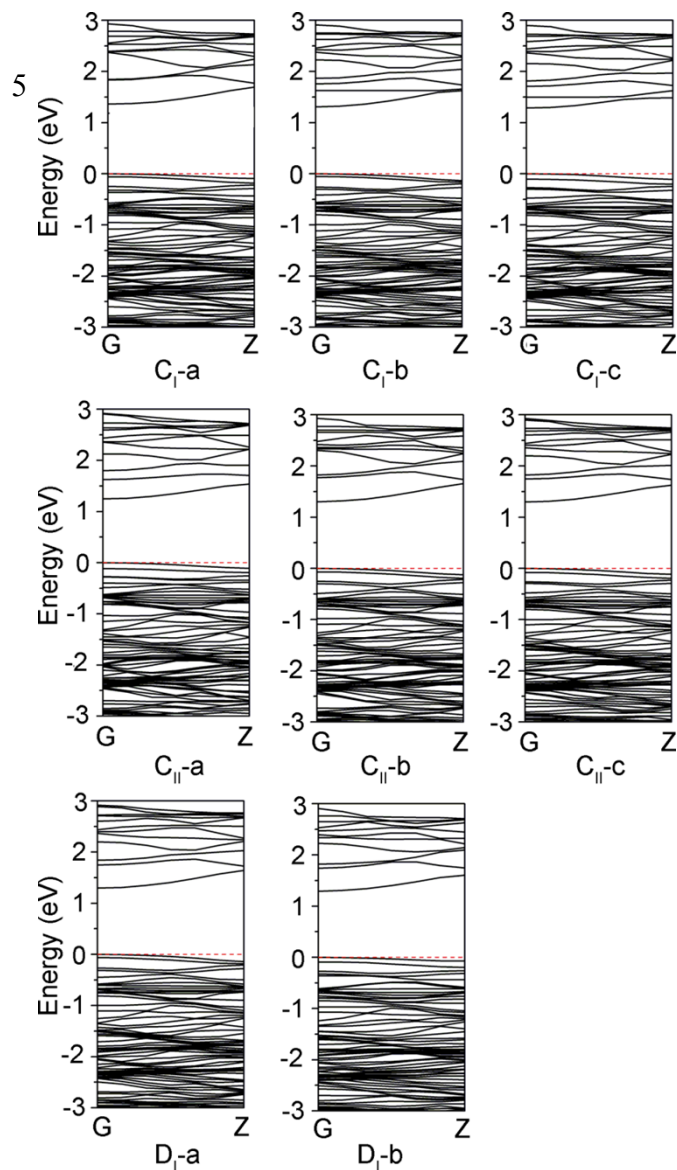

Figure S2.

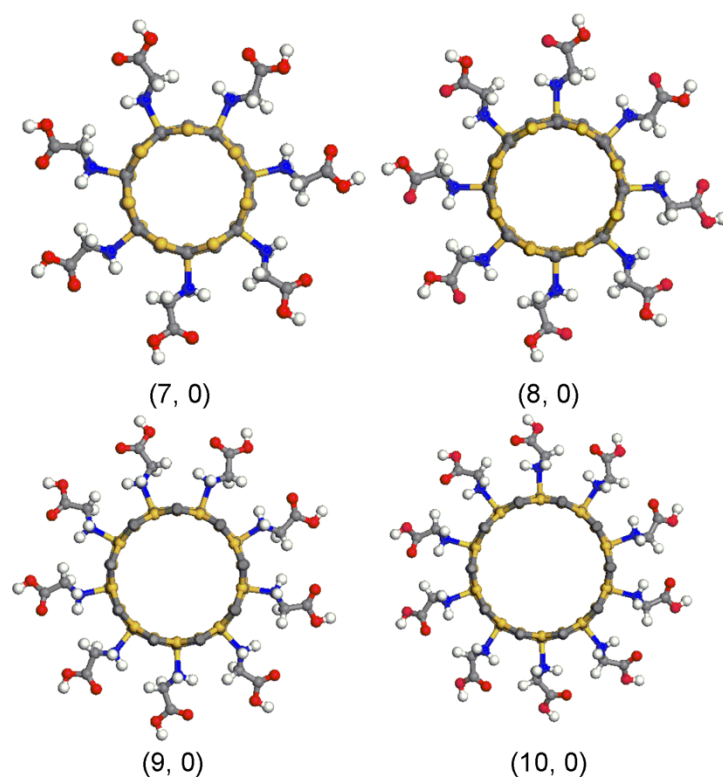

Figure S3.

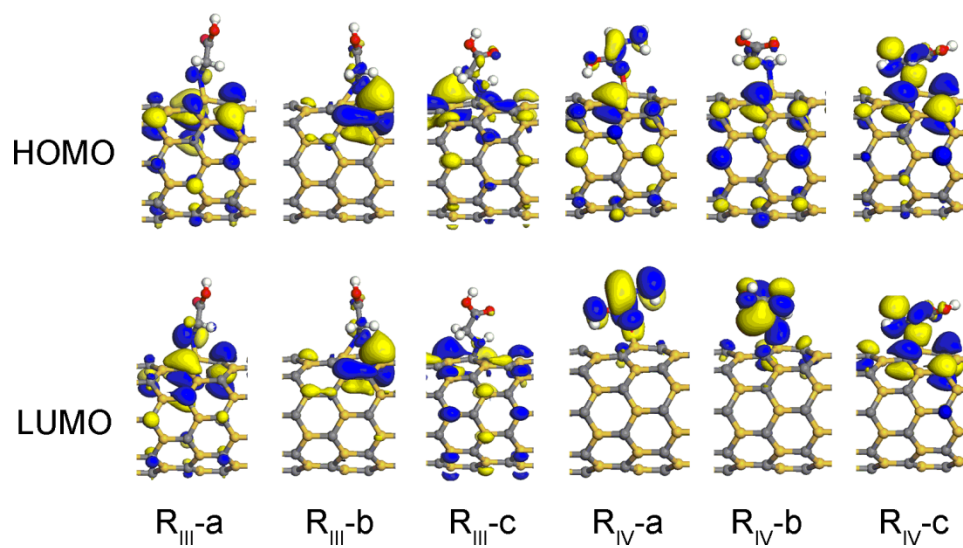

Supplement: c4cp01951b1.pdf [file c4cp01951b1.pdf]
